# Supplementary material for: The HDAC inhibitor CI-994 acts as a molecular memory aid by facilitating synaptic and intracellular communication after learning
Source: PubMed Central journal article supplement — Proc Natl Acad Sci U S A. 2022 May 25;119(22):e2116797119. doi: 10.1073/pnas.2116797119 (PMC9295763; doi:10.1073/pnas.2116797119), 2022-05-25
Supplement: pnas.2116797119.sapp.pdf [file pnas.2116797119.sapp.pdf]

## 1 **Supplemental Materials and Methods**

2 **Animals.** All procedures, including animal experiments, were handled according to protocols  
3 approved by Swiss animal licenses VD2808/2808.1, VD2875/2875.1, VD3169 and VD3413  
4 and according to the standard operating procedures of E-PHY-SCIENCE SAS (ENV/JM/MNO  
5 (2077)). Ten-week-old C57BL/6J male mice were purchased from Janvier Labs and allowed  
6 an acclimatization and handling period in the EPFL animal house for two weeks before  
7 experimentation. All animals were housed in groups of 4-5 animals at 22-25° C on a 12-hour  
8 light-dark cycle with food and water ad libitum.

9 **Contextual fear conditioning (CFC).** All behavioral testing was performed between 9AM and  
10 1PM. The context groups in all experiments were exposed to the conditioning chamber for the  
11 same amount of time with no shocks. The chamber was cleaned with 5% ethanol between  
12 each animal.

13 Animal velocity (average cm/s) and distance travelled (total cm) during the habituation phases  
14 were calculated automatically by the TSE system. Changes in anxiety were determined by  
15 dividing the conditioning chamber into 36 sections and calculating the percent of total time each  
16 animal spent in the inner 16 section (no bordering wall) of the fear conditioning chamber during  
17 the initial habituation phase.

18 **Rotarod.** Motor performance was measured using a Rotarod apparatus (Bioseb, model  
19 LE8200). Mice were placed on the rotating rod, and the latency to fall was measured while the  
20 speed was accelerating from 4 to 40 rpm. Trials began when mice were placed on the rod and  
21 rotation began. Each trial ended, and latency was recorded, when the mouse fell off the rod.  
22 Mice were tested for 4 trials with a 1 minute inter-trial interval (1).

23 **Electrophysiology. Input/Output (I/O).** Synaptic transmission input/output (I/O) curves were  
24 constructed at the beginning of each experiment to assess basal synaptic transmission. For the  
25 I/O, a stimulus ranging from 0 to 100  $\mu$ A by 10  $\mu$ A steps was applied and measured every 5  
26 secs.

27 *Field excitatory postsynaptic potential (fEPSP).* The following quality control and exclusion  
28 criteria were applied during the fEPSP analysis: A 10-min baseline-recording period preceded  
29 burst stimulation; signals with a fiber volley amplitude bigger than fEPSP amplitude and slices  
30 that failed to exhibit a linear increasing I/O curve were excluded from the analyses; likewise,  
31 slices that failed to show stable fEPSP slopes ( $> 15\%$  change) during this period and slices  
32 that not exhibiting a slope modification in either direction of at least 5 % after burst stimulation

33 were excluded from the analyses; slices that showed a decreasing slope reaching a close to  
34 null value were considered dying slices; potential outliers were identified for exclusion using  
35 mean  $\pm$  3x standard deviation.

36 *Paired Pulse Facilitation (PPF)*. Paired Pulse Facilitation (PPF) was performed to assess  
37 short-term plasticity. For PPF, two stimulations were applied and measured at 50, 100, 150,  
38 200, 300 and 400 ms intervals. PPF measurements were normalized by normalizing the first  
39 fEPSP slope to 1 and comparing it with the second fEPSP slope.

40 **HDACi assay**. Hippocampal and striatal hemispheres collected 1h after CFC were  
41 homogenized and incubated for 30-min on ice in RIPA buffer (150mM NaCl, 50mM Tris-HCl  
42 pH8, 0.1% SDS, 0.5% deoxycolate, 1% NP-40). Nuclear proteins were extracted in HDAC  
43 buffer (50mM Tris-HCl pH8, 137nM NaCl; 2.7mM KCl; 1mM MgCl<sub>2</sub>; 1mg/mL BSA) and  
44 sonicated for 15-min (Diagenode, Bioruptor Plus). Pan-HDAC enzyme activity was determined  
45 using the Fluor de Lys HDAC fluorometric activity assay kit (Enzo Life Science, BML-AK500).  
46 Fluorescence intensity (380nm excitation; 510 nm emission) was measured on a the Infinite  
47 M200 Pro (Tecan). Mice treated with VEH and not undergoing fear conditioning were  
48 considered as baseline HDAC activity.

49 **RNA-seq**. *RNA extraction and library preparation*. Single frozen hippocampal and striatal  
50 hemispheres from four biological replicates were isolated after CFC. Samples were  
51 homogenized and total RNA was isolated using Trizol Reagent (Life Technologies) according  
52 to the manufacturer's protocol. RNA was further purified by an on-column DNase digestion  
53 using the RNase-Free DNase Set (Qiagen, Cat# 79254) and two rounds of washes using the  
54 RNAeasy Mini Kit (Qiagen, Cat# 74106). Total RNA concentration was determined with the  
55 Nanodrop 1000 (v3.8.1, Thermo Fisher).

56 Libraries were prepared using the TruSeq Stranded mRNA Preparation Kit (Illumina) starting  
57 from 900ng of RNA. Libraries were quantified with the dsDNA HS Assay kit (Qubit, Cat#  
58 Q32851) and profile analysis was performed using the TapeStation (Agilent, TS4200) D500  
59 Screen Tape System (Agilent, Cat#5067- 5588 and 5067-5589). Finally, libraries were  
60 multiplexed and sequenced across five lanes on the Illumina HiSeq 4000 (Illumina), yielding  
61 100-bp, paired-end reads, at EPFL's gene expression core facility.

62 *RNA-seq analysis*. Truseq adapter sequences were trimmed from raw FASTQ files using  
63 bcl2fastq (v2.20.0, Illumina). STAR (v2.6)(2) was used to align FASTQ reads to the mouse  
64 mm10 reference genome with annotations downloaded from Ensembl release 93(3). A custom  
65 R script was used to count reads mapping to the exonic regions of genes and to define

66 transcript abundance. Reads were only considered if they overlap a single gene region.  
67 Differential expression and downstream analysis were performed using DEseq2(4) and  
68 custom R scripts. Genes were considered differentially expressed if they had an adjusted p-  
69 value  $\leq 0.05$  and a  $|\log_2FC| \geq 0.4$ . For the trajectory analysis, all experimental groups were  
70 compared to samples coming from VEH-Context animals (baseline). Genes were first grouped  
71 based on whether they were upregulated, downregulated or not changed between the VEH-  
72 CFC vs. VEH-Context. Next, each group was further divided based on whether they were  
73 more upregulated, more downregulated or not changed in the pair-wise comparison between  
74 HDACi-Context and VEH-Context. Finally, these subsets of genes were individually grouped  
75 based on their  $\log_2FC$  between the HDACi-CFC and the VEH-Context comparisons.  
76 Trajectory pathway analysis was performed using custom-written scripts in R.

77 **Single-nuclear RNA-seq. Library Preparation.** For single-nuclear RNA-sequencing (snRNA-  
78 seq) animals were treated with either VEH or HDACi and exposed to CFC. For each sample,  
79 both hippocampal hemispheres from 5 mice were pooled into two replicates each of VEH and  
80 HDACi treated groups. Nuclear extractions were performed as described. Nuclear structural  
81 quality was checked using an EVOS cell imaging system and nuclei were counted and diluted  
82 to 1,000 nuclei/ $\mu$ l.

83 *Library Sequencing.* Library constructions were performed using Chromium SingleCell  
84 3'Reagent Kit v3 chemistry (10x Genomics) according to the manufacturers protocol  
85 (CG000183 - Rev A). All 4 libraries were pooled and sequenced across 2 NextSeq 500 (v2.5)  
86 chips for 75 cycles. FASTQ files were generated using `cellranger mkfastq` (CellRanger v3.0.1),  
87 yielding an R1 length of 28nt and an R2 length of 56 nucleotides.

88 *snRNA-seq analysis.* To generate single cell feature counts `cellranger count` (CellRanger  
89 v3.0.1) was run to align FASTQ files to the mm10 pre-mRNA genome (created using  
90 `cellranger mkref` (CellRanger v3.0.1)) using the following settings: expect-cells=4000,  
91 chemistry = SC3Pv3, r2-length = 56. These commands provide further information about the  
92 read lengths to expect after sequencing, the chemistry version used to create the 10x samples  
93 and the number of cells to expect based on what was recommended by the core facility (default  
94 is 3000). Downstream analysis was performed using custom R-scripts. Seurat (v4.0.3) (5) was  
95 used to calculate quality control metrics. DoubletFinder (6) was used to find and remove  
96 doublets and normalization and variance stabilization was done using SCTransform (7).  
97 Seurat was then used to perform UMAP and TSNE clustering, to define clusters using  
98 molecular identifiers. Differential expression analysis between VEH and HDACi treated groups  
99 was performed for each cell type using the logistic regression framework, accounting for

100 replicates, in Seurat's `FindMarkers()` command. Genes were considered differentially  
101 expressed if  $|\log_2FC| \geq 1$  and  $P \leq 0.05$ . This is in contrast to cutoffs used in the bulk RNA-  
102 sequencing as different tests were used as a logistic regression was used in Seurat's  
103 `FindMarkers()` and a negative binomial distribution was used in DESeq2 for the bulk RNA-  
104 sequencing. In addition, single nuclear compares UMI counts across hundreds of nuclei  
105 whereas bulk RNA-sequencing compares read counts across 4 replicates. Since this is cell-  
106 type specific, there are also differences in total expressed numbers of genes in each cell type  
107 compared to the bulk RNA-sequencing. These differences yield variable  $\log_2FC$  variation and  
108 it is best to be more stringent in the snRNA-sequencing analysis in order to get comparable  
109 proportions of DEGs in each analysis.

110 To determine what was causing the HDACi-mediated split seen in the UMAP for Excitatory  
111 Neurons of the DG and glial cell types, we performed an analysis in which we removed subsets  
112 of genes and re-clustered nuclei. Up ( $\log_2FC \geq 1$ ;  $P \leq 0.05$ ) and downregulated ( $\log_2FC \leq -1$ ;  
113  $P \leq 0.05$ ) genes from the HDACi-Veh comparisons for each cell type were independently  
114 removed from the matrix of alignment counts. UMAP dimension reduction was then rerun on  
115 the subsetted counts to see whether those gene subsets were driving the cell type splits. This  
116 DEG removal test was performed using a custom written script in R.

117 Augur (8, 9) was used with default commands to calculate perturbation prioritization for each  
118 cell type and `scProportionsTest` (10) to compute cell type composition changes between  
119 HDACi and VEH treated samples.

120 **Western Blots.** Animals underwent HDACi administration and subthreshold CFC as  
121 described above. Full hippocampi were dissected and flash frozen 1 h after CFC. Frozen  
122 hippocampal hemispheres were cut in half, homogenized and incubated for 30 min on ice in  
123 500 $\mu$ l RIPA buffer (150mM NaCl, 50mM Tris-HCl pH8, 0.1% SDS, 0.5% deoxycolate, 1% NP-  
124 40) with 20 $\mu$ l 20x protease inhibitor (Complete mini, EDTA-free, Sigma Aldrich  
125 Cat#11836170001). Nuclei were collected by centrifugation (max speed, 20 min, 4°C) and  
126 cytoplasm (supernatant) was transferred to a new tube. The nuclear pellet was mixed with  
127 50 $\mu$ l 1x Laemmli buffer, sonicated for 10 min at full power and boiled for 10 min at 90°C or  
128 until samples were no longer viscous. Protein quantifications were performed using a DC  
129 assay. For each sample, 10 $\mu$ g protein was added to SDS-PAGE gel (12.5% acrylamide in  
130 Resolving Gel and 4.5% in stacking gel) and run at 25A for ~1.5 h. Proteins were then  
131 transferred to nitrocellulose membrane for 2 h at 4°C and blocked for 1 h in 5% milk in PBS-  
132 Tween20. Primary antibodies (1:2500 H4K12ac (ab46983), 1:500 H3K9ac (ab10812), and

133 1:5000 H3K27ac (ab4729) in 2% milk + PBS-Tween20) were incubated with the membrane  
134 overnight at 4°C (except 1:5000 total H3 (ab1791), incubated for only 30 min at RT). Then  
135 membranes were washed 3x in TBS-Tween20 and secondary antibodies (1:10,000 Goat anti-  
136 rabbit in 2% milk) for 1 h at RT. Membranes were washed and incubated with  
137 chemiluminescent ECL Plus (GE Healthcare, Cat# RPN2232SK) for 5 min before visualization  
138 on the Fusion FX Vilber Laurmat imaging system. Due to similar sizes of histone markers,  
139 blotting was done separately and stripped between each antibody.

140 To quantify chemiluminescence, images were analyzed using “Set Measurements” in ImageJ.  
141 For each blot, percent of total luminescence was calculated for each band and normalized to  
142 the respective H3 total luminescence. Technical replicates (same samples, 2 western blots)  
143 were averaged together for each antibody and per biological replicate (6 replicates per  
144 treatment).

145 **ChIP-seq. Nuclear sorting.** ChIP-seq was performed on 3 replicates per treatment and each  
146 replicate consisted of the pooled dentate gyri from 5 mice. After nuclear extraction (see  
147 above), filtered nuclei were cross-linked by incubating with 1% formaldehyde (AppliChem,  
148 A08770) for 5 min at RT. Cross-linking was quenched with 125mM glycine (VWR, 101196X)  
149 and nuclear structural quality was assessed using an EVOS FL cell imaging system (Life  
150 Technologies).

151 For each sample, approximately 750,000 nuclei were resuspended in 500µl PBS-T (PBS,  
152 0.1% Tween 20). Nuclei were stained with 1:50 Alexa Fluor488 conjugated anti-NeuN antibody  
153 (Millipore, MAB377X) for 30 min, spun down (1250rcf, 4°C, 5 min), washed in PBS-T (0.1%  
154 Tween 20) twice, resuspended and stored in 200µl PBS-T until sorting.

155 Flow cytometry was performed on the FACSAriaIII (BD Bioscience) by the EPFL Flow  
156 Cytometry Core Facility (FCCF). Before sorting, samples were passed through a 26G needle  
157 5 times. Hoechst (1:1000) was mixed into each sample and incubated on ice for 10 mins.  
158 Debris was first excluded by gating using forward and side scatter pulse area parameters  
159 (FSC-A and SSC-A). Multiplets were then excluded by gating FSC-H vs. FSC-W and SSC-H  
160 vs. SSC-W. Single nuclei were sorted by Hoechst intensity, elicited by 405 nm wavelength  
161 excitation and measured at 425-475nm (450/50-A). Finally, NeuN+ nuclei were sorted into ice-  
162 cold Eppendorf tubes containing 100µl PBS-T.

163 **Chromatin immunoprecipitation (ChIP).** After sorting, nuclei were pelleted by centrifugation  
164 (4°C, 1250g, 5 min) and lysed by incubating in 750µl RIPA buffer on ice for 10 min. Samples  
165 were sonicated on an E220 Focused-ultra-sonicator (Covaris) for 20 min (Peak power = 140W,

166 Duty = 5, Cycle/Burst = 200). Sonication efficiency was measured by decrosslinking 125 $\mu$ l of  
167 chromatin in 500 $\mu$ l of TL-Brain Buffer (10mM Tris-HCl pH7.5, 10mM EDTA 200mM NaCl),  
168 50 $\mu$ l of 10% SDS and 1 $\mu$ l of RNaseA (Thermo Fisher, Cat#EN0531) and incubating at 65°C  
169 and 650rpm overnight. 10 $\mu$ l recombinant, PCR-grade Proteinase K (Roche,  
170 Cat#03115828001) was added and incubated at 45°C and 650 rpm for another hour. DNA  
171 was extracted with AcNH<sub>4</sub> (100 $\mu$ l of 10M), 20 $\mu$ l glycogen (10 $\mu$ g/ $\mu$ l) and 1ml cold isopropanol  
172 and then pelleted by centrifuging at 14000rcf, 4°C for 20 min. DNA was further purified in 1ml  
173 70% EtOH and centrifuged (14000rcf, 4°C, 10 min). Sonicated DNA size was assessed on a  
174 1.5% agarose gel.

175 The rest of the ChIP experiment (beginning from “Protein G Agarose Bead Preparation”) was  
176 carried out using the reagents and protocols from the Low Cell ChIP-Seq Kit (Active Motif,  
177 53084). In brief, 400 $\mu$ l of sonicated chromatin was first cleared by incubating with pre-cleared  
178 Protein G agarose beads for 2 h on a rotator at 4°C. Half was kept as input for each sample.  
179 The other half was immunoprecipitated overnight at 4°C with 3 $\mu$ l of H3K27ac (Abcam,  
180 ab4729). After precipitation, pre-cleared Protein G agarose were added for 3 h, and both input  
181 and IP samples were washed following the kit specifications. Cross-linking was reversed by  
182 incubating samples with 5 $\mu$ l 5M NaCl and 2 $\mu$ l proteinase K at 65°C, 300rpm overnight. DNA  
183 was purified using phenol-chloroform.

184 *Library preparation.* To prepare libraries for both input and IP samples, the Next Gen DNA  
185 Library Kit (Active Motif, Cat# 53216) and Next Gen Indexing Kit (Active Motif, Cat# 53264)  
186 were used according to the manufacturer’s instructions. After adaptor ligation, fragments were  
187 amplified (1 cycle, 30s at 98°C; 14 cycles, 10s at 98°C, 30s at 60°C and 60s at 68°C) and DNA  
188 was cleaned and purified using magnetic SPRI beads (Beckman Coulter, Ca# B23317).  
189 Libraries were resuspended in 25 $\mu$ l Low EDTA TE buffer and concentration was measured  
190 using a Qubit dsDNA HS Assay Kit. DNA fragments size was determined using a Fragment  
191 analyzer (NGS High Sensitivity kit (DNF-474), Agilent). Libraries were sequenced, paired-end,  
192 on the Illumina NextSeq 500 at EPFL’s gene expression core facility.

193 *ChIP-seq analysis.* The Next Gen DNA Library Kit (Active Motif) includes molecular identifiers  
194 (MIDs), a 9-base random N sequence that is added with the P5 adaptor, to allow for removal  
195 of PCR duplicates from sequencing data. While R1 (75bp) contains the sequence information,  
196 R2 (9 bp) contains the MID information. To conserve MID information during mapping, the  
197 MID sequence from R2 was appended to the FASTQ header in R1 using a custom R-script.  
198 Adapter sequences and low quality regions from R1 were removed using Trimmomatic

199 (v0.38)(11) in single end mode with the following parameters:  
200 ILLUMINACLIP:Y2\_adapter\_seq.fa:0:6:6 SLIDINGWINDOW:10:20 MINLEN:36.

201 The processed FASTQ file (R1) was then aligned to the mm10 genome using Bowtie2  
202 (v2.3.5)(12) in single-end mode and using default parameters. SAMtools (v1.9) (13) was used  
203 to convert SAM files to BAM format and then to sort BAM files. PCR duplicated alignments  
204 were removed from the BAM files using a perl script by Active Motif. Finally, multi-mapping  
205 and low-quality reads ( $\geq 40$ ) were removed and BAM files were re-indexed using SAMtools.

206 Open chromatin peaks were defined using MACS2(14) in broad peak mode. Differentially  
207 acetylated regions (DARs) were identified using Diffbind (v2.16.2) (15) and DEseq2(v  
208 1.28.1)(4) with default parameters. Peaks were considered differentially enriched if they had  
209 a false discover rate (FDR)  $\leq 0.05$  and  $|\log_2\text{FoldChange}| \geq 1$ .

210 Since H3K27ac is a marker for both promoters and enhancers, ChromHMM (v1.22)(16) was  
211 used to establish a chromatin state model that identified enhancers and promoters. The  
212 program was run, allowing for 8 states, on independently published ChIP-sequencing data  
213 (17), taken from bulk hippocampal tissue 1 h after CFC. The entire mouse genome was  
214 assigned to one of five chromatin states: Control regions; repressed regions; promoter  
215 regions; primed enhancers; and active enhancers (**Supplemental Fig. 14A**). We calculated  
216 the state overlap for each peak and assigned the peak to the state that covered the highest  
217 proportion (**Supplemental Fig. 14B**). Doing so, 70.5% of bases assigned as active enhancers  
218 in ChromHMM were enriched for H3K27ac in our dataset; 44% and 34.9% of bases assigned  
219 as primed enhancers and promoters, respectively, while only 2.8% and 2.9% of control regions  
220 and repressed regions had H3K27ac peaks (**Supplemental Fig. 14C**). This information was  
221 aligned with our own peak information to define differentially expressed enhancers and  
222 promoters. We assigned enhancers to genes using HOMER (v4.11) `annotatePeaks.pl` (18).  
223 Downstream trajectory analysis was performed (as described in the *RNA-sequencing Analysis*  
224 section) separately for peaks in different chromatin states.

225 All in-house analysis code can be found at [https://github.com/allie-burns/2022\\_Burns\\_et al.](https://github.com/allie-burns/2022_Burns_et al.)

226 **Supplemental References**

- 227 1. M. A. Kheirbek, *et al.*, Adenylyl cyclase type 5 contributes to corticostriatal plasticity and  
228 striatum-dependent learning. *J. Neurosci.* **29**, 12115–12124 (2009).
- 229 2. A. Dobin, *et al.*, STAR: Ultrafast universal RNA-seq aligner. *Bioinformatics* **29**, 15–21  
230 (2013).
- 231 3. D. R. Zerbino, *et al.*, Ensembl 2018. *Nucleic Acids Res.* **46**, D754–D761 (2018).
- 232 4. M. I. Love, W. Huber, S. Anders, Moderated estimation of fold change and dispersion  
233 for RNA-seq data with DESeq2. *Genome Biol.* **15**, 1–21 (2014).
- 234 5. Y. Hao, *et al.*, Integrated analysis of multimodal single-cell data. *Cell* **184**, 3573–3587  
235 (2021).
- 236 6. C. S. McGinnis, L. M. Murrow, Z. J. Gartner, DoubletFinder: Doublet Detection in Single-  
237 Cell RNA Sequencing Data Using Artificial Nearest Neighbors. *Cell Syst.* **8**, 329–337  
238 (2019).
- 239 7. C. Hafemeister, R. Satija, Normalization and variance stabilization of single-cell RNA-  
240 seq data using regularized negative binomial regression. *Genome Biol.* **20**, 296 (2019).
- 241 8. J. W. Squair, M. A. Skinnider, M. Gautier, L. J. Foster, G. Courtine, Prioritization of cell  
242 types responsive to biological perturbations in single-cell data with Augur. *Nat. Protoc.*,  
243 1–42 (2021).
- 244 9. M. A. Skinnider, *et al.*, Cell type prioritization in single-cell data. *Nat. Biotechnol.* **39**,  
245 30–34 (2021).
- 246 10. S. A. Miller, B. Policastro, scProportionTest (2020).
- 247 11. A. M. Bolger, M. Lohse, B. Usadel, Trimmomatic: A flexible trimmer for Illumina  
248 sequence data. *Bioinformatics* **30**, 2114–2120 (2014).
- 249 12. B. Langmead, S. L. Salzberg, Fast gapped-read alignment with Bowtie 2. *Nat. Methods*  
250 **9**, 357–359 (2012).
- 251 13. H. Li, *et al.*, The Sequence Alignment/Map format and SAMtools. *Bioinformatics* **25**,  
252 2078–2079 (2009).
- 253 14. Y. Zhang, *et al.*, Model-based Analysis of ChIP-Seq (MACS). *Genome Biol.* **9**, R137  
254 (2008).
- 255 15. R. Stark, G. Brown, DiffBind: differential binding analysis of ChIP-Seq peak data (2011).
- 256 16. J. Ernst, M. Kellis, ChromHMM: Automating chromatin-state discovery and  
257 characterization. *Nat. Methods* **9**, 215–216 (2012).
- 258 17. R. Halder, *et al.*, DNA methylation changes in plasticity genes accompany the formation  
259 and maintenance of memory. *Nat. Neurosci.* **19**, 102–110 (2016).
- 260 18. S. Heinz, *et al.*, Simple Combinations of Lineage-Determining Transcription Factors  
261 Prime cis-Regulatory Elements Required for Macrophage and B Cell Identities. *Mol.*  
262 *Cell* **38**, 576–589 (2010).



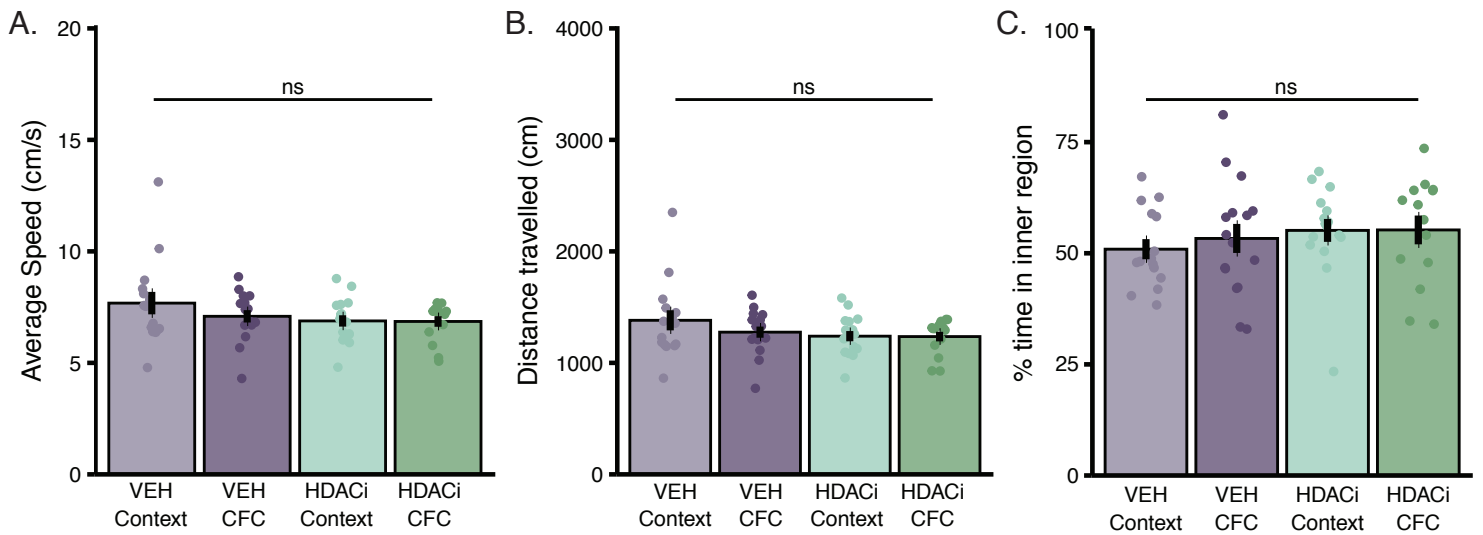

**Supplemental Fig. 1. HDACi treatment does not affect speed, distance travelled or anxiety levels. (A)** Average animal speed (cm/s) during the 3-minute habituation of behavioral conditioning was not affected by CI-994 injection. **(B)** Average distance travelled (cm) during the 3-minute habituation of conditioning was not different between Vehicle and CI-994 (HDACi) injection. **(C)** Time spent in inner regions of the conditioning chamber during the 3-minute habituation of conditioning did not change between Vehicle or CI-994 injection. One or two-way ANOVA with Tukey's HSD multiple comparisons test was used for analysis. Graphs represent mean  $\pm$ SEM. ns = not significant. n (VEH-Context) = 15; n (VEH-CFC and HDACi-Context) = 16; n (HDACi-CFC) = 14.

A. PPF – Hippocampus (DG)

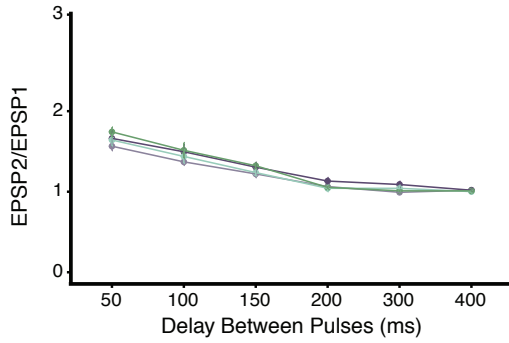

B. PPF – Striatum

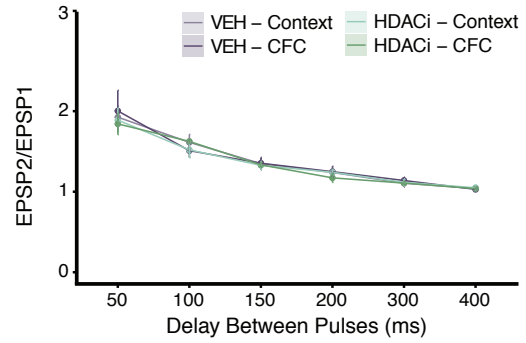

C. I/O – Hippocampus (DG)

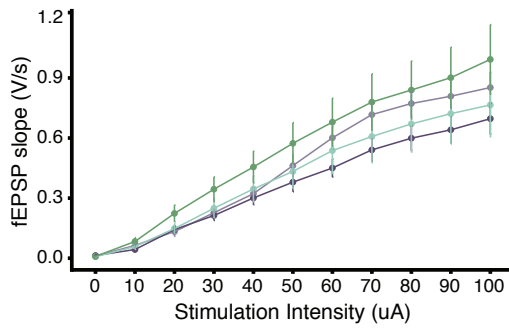

D. I/O – Striatum

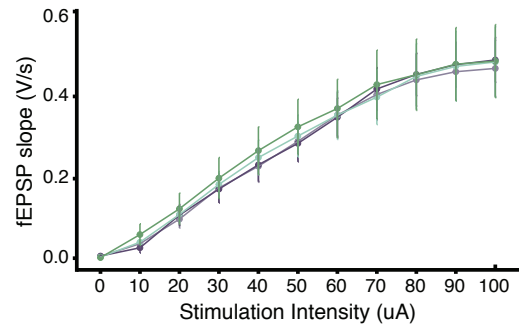

**Supplemental Fig. 2. HDACi does not alter PPF or I/O in the hippocampus or striatum after CFC. (A and B)** Paired pulse facilitation (PPF) in the DG (A) and striatum (B) 1 hour after CFC. (C and D) Input/output (I/O) relationship in the DG (C) and striatum (D) 1 hour after CFC. Graphs represent mean  $\pm$ SEM. n = 8 animals/group.

### A. LTP – Hippocampus (CA1)

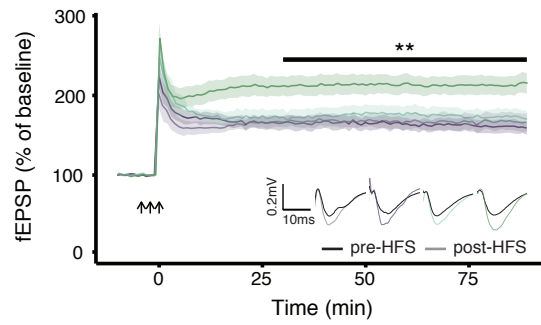

### B. PPF – Hippocampus (CA1)

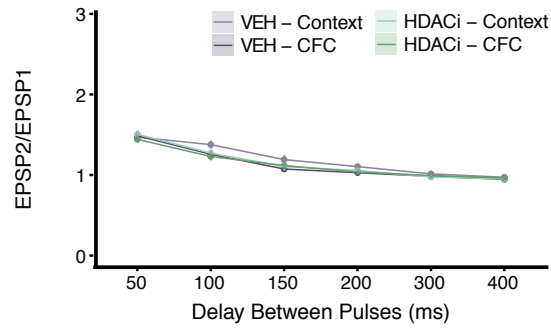

### C. I/O – Hippocampus (CA1)

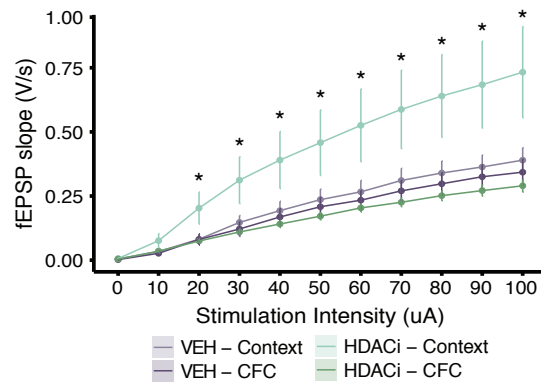

**Supplemental Fig. 3. HDACi combined with CFC enhances LTP in hippocampal area CA1.** (A) HDACi combined with CFC enhanced LTP in response to 3 trains of high frequency stimulation (HFS – arrows) at Schaffer Collaterals of the hippocampal CA1 one hour after behavioral training. Statistical differences were calculated for the 30 minutes (end of short-term-potential) to 90 minutes (end of recording) for each mouse. (B) There were no treatment-induced differences in PPF in the CA1. (C) HDACi-Context animals had a larger I/O relationship than other groups. Graphs represent mean  $\pm$ SEM. \*  $P < 0.05$ , \*\*  $P < 0.01$ .  $n = 8$  animals/group.

### A. Experimental Schematic

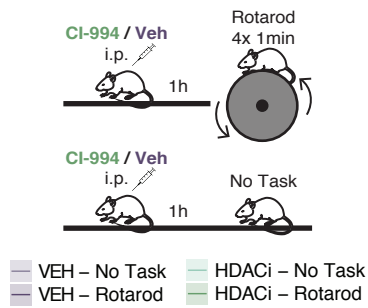

### B. Motor Learning

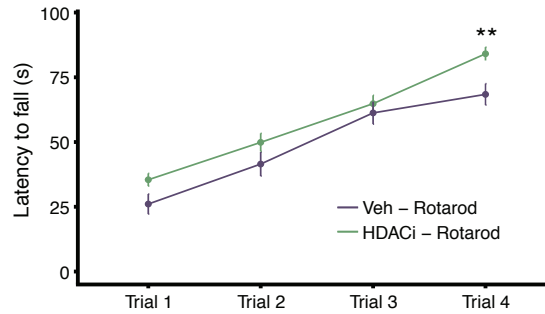

### C. LTP – Hippocampus (CA1)

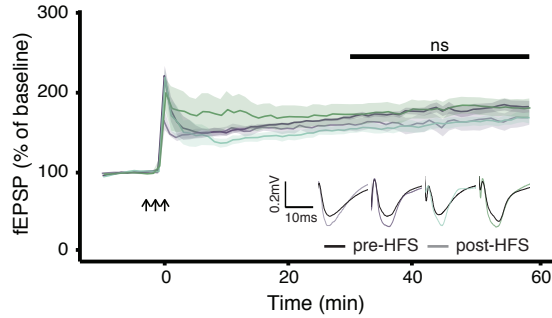

### D. LTP – Striatum

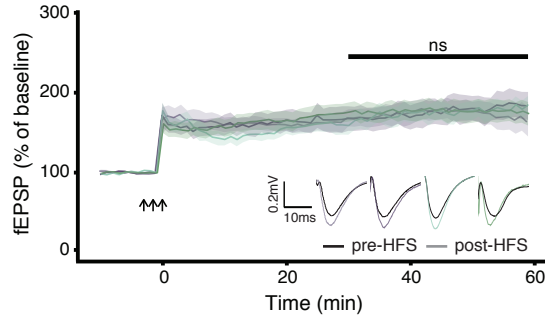

### E. PPF – Hippocampus (CA1)

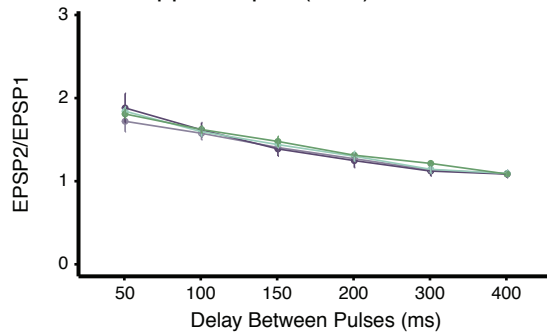

### F. PPF – Striatum

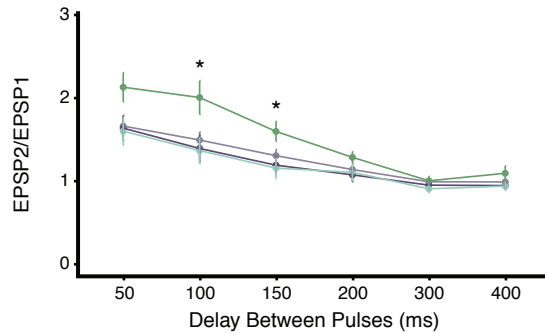

### G. I/O – Hippocampus (CA1)

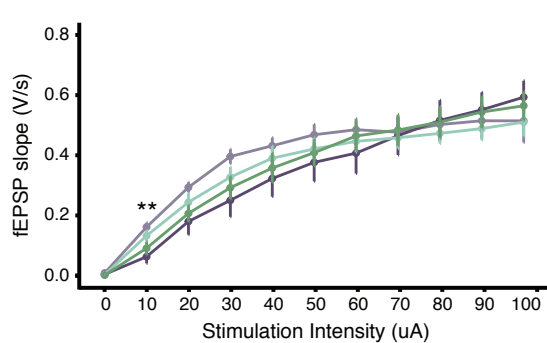

### H. I/O – Striatum

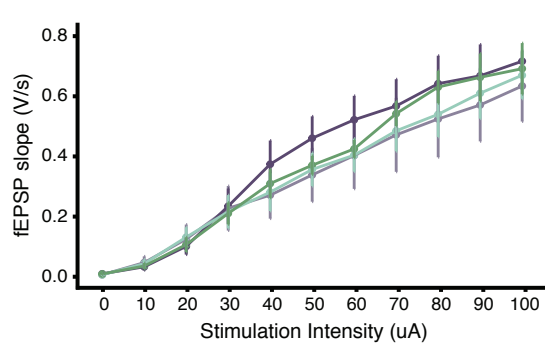

**Supplemental Fig. 4. HDACi enhances PPF in the cortico-striatal pathway after motor learning.** (A) Experimental schematic. Animals were i.p. injected with either Vehicle or CI-994 (30mg/kg) one hour prior to rotarod training. (B) HDACi combined with rotarod training increased the time to fall off the rotarod. (C and D) HDACi combined with rotarod training did not alter LTP in response to 3 trains of high frequency stimulation (HFS – arrows) in the Schaffer Collaterals of hippocampal CA1 (C) or in the cortical-striatal pathway (D) one hour after final rotarod trials. Statistical differences were calculated for the 30 minutes (end of short-term-potential) to 90 minutes (end of recording) for each mouse. (E and F) HDACi paired with rotarod training did not lead to any differences in PPF in the Schaffer Collaterals of the CA1 (E) but it enhanced PPF in cortico-striatal fibers (F) after a delay of 100 or 150ms between pulses. (G and H) I/O relationships were overall similar in response to HDACi and rotarod training in the Schaffer Collaterals of CA1 (G) or cortico-striatal fibers (H). Graphs represent mean  $\pm$ SEM. \*  $P < 0.05$ , \*\*  $P < 0.01$ , ns = not significant. n (striatum) = 10 animals per rotarod task/treatment, 8 animals per no task/treatment; n (hippocampus) = 6 animals/group.

A. Hippocampus

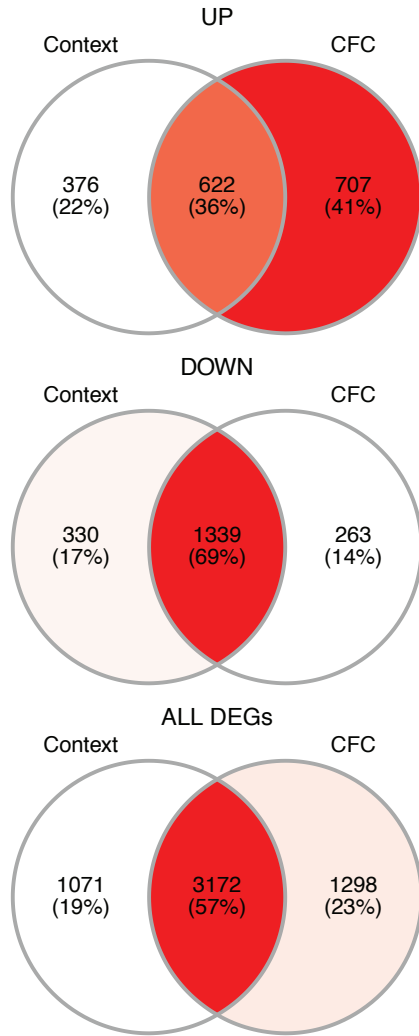

B. Striatum

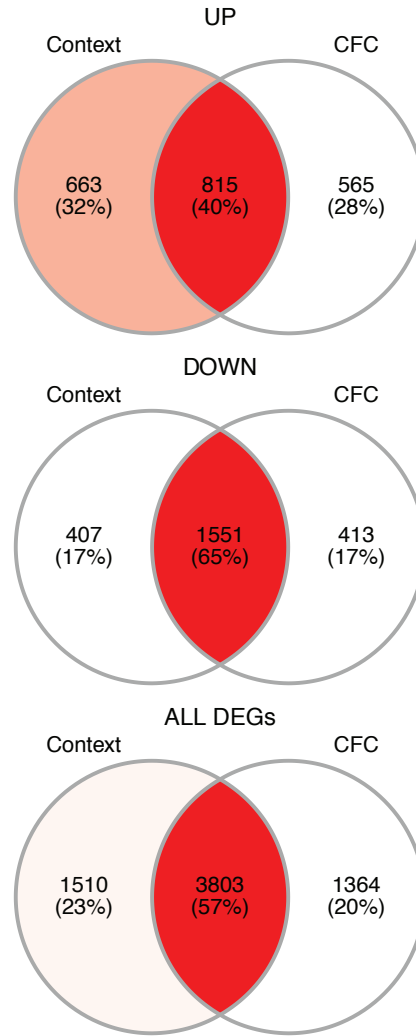

**Supplemental Fig. 5. Overlap of differentially expressed genes (DEGs) by HDACi paired with context or CFC.** Venn diagrams of genes that are upregulated (top), downregulated (middle row) or differentially expressed in either direction (bottom) in the context pair-wise comparison (HDACi-Context vs VEH-Context) and the CFC pair-wise comparison (HDACi-CFC vs VEH – CFC) in the hippocampus (A) and the striatum (B).

### A. Hippocampus

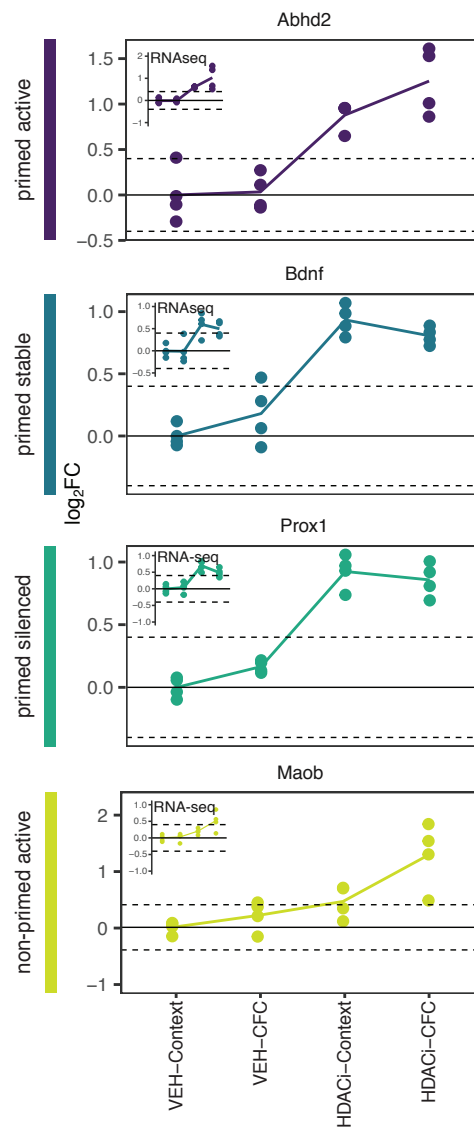

### B. Striatum

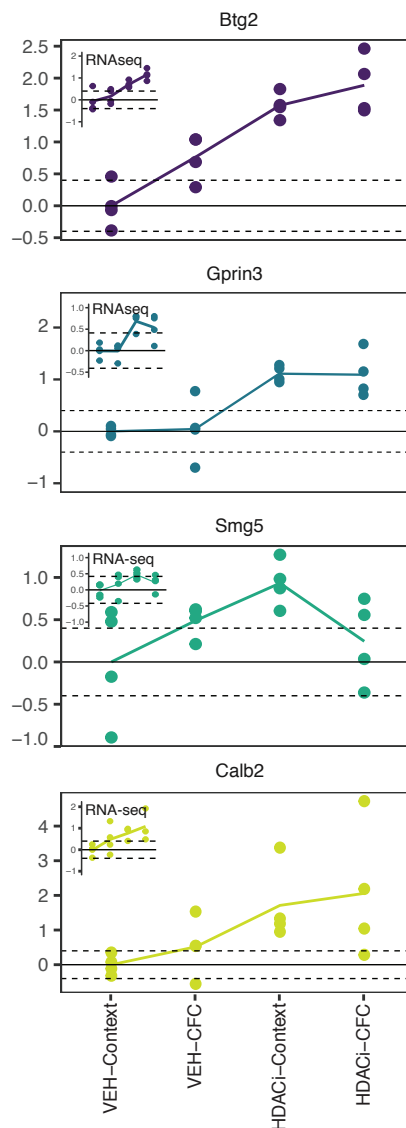

**Supplemental Fig. 6. Validation of the bulk RNA-seq analysis by qRT-PCR.** Example qRT-PCR fold change expression of genes in each trajectory for the hippocampus (A) and striatum (B). Insets represent  $\log_2FC$  comparisons of these genes from the RNA-seq analysis. Points represent calculated  $\log_2FC$  for each biological replicate compared to the average VEH-Context. Lines represent the average  $\log_2FC$  for each group.  $n = 4$  animals/group.

### A. Hippocampus

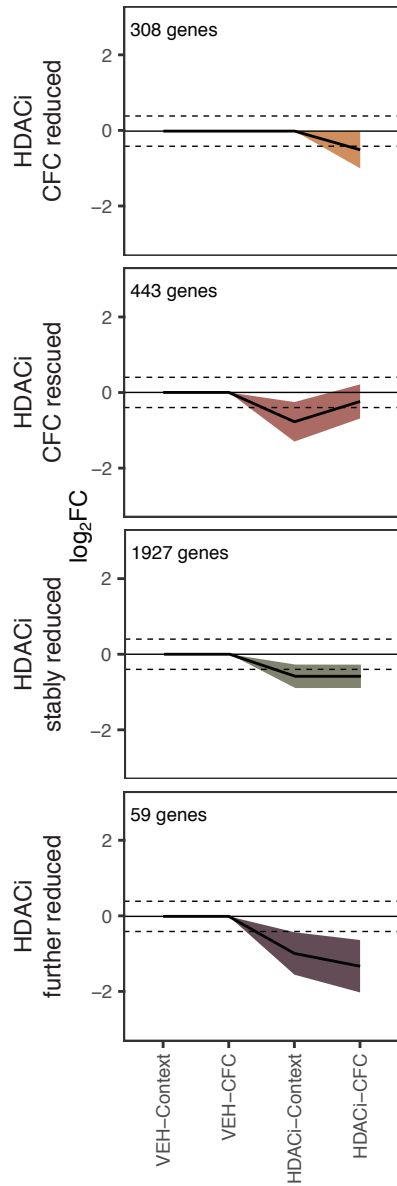

### B. Striatum

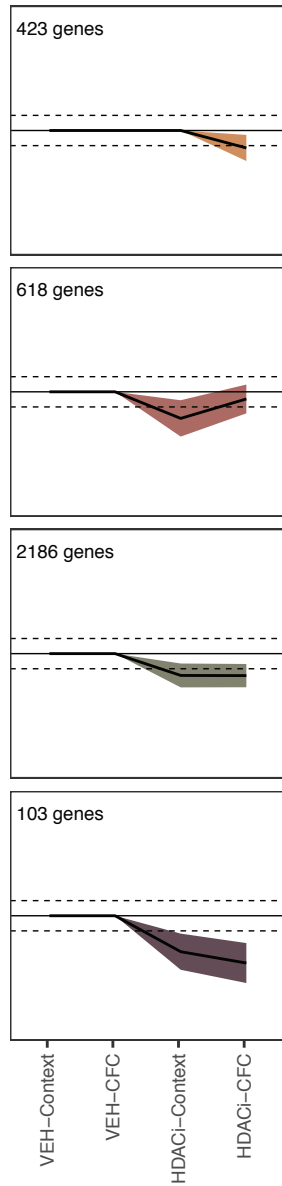

### C. GO Comparisons

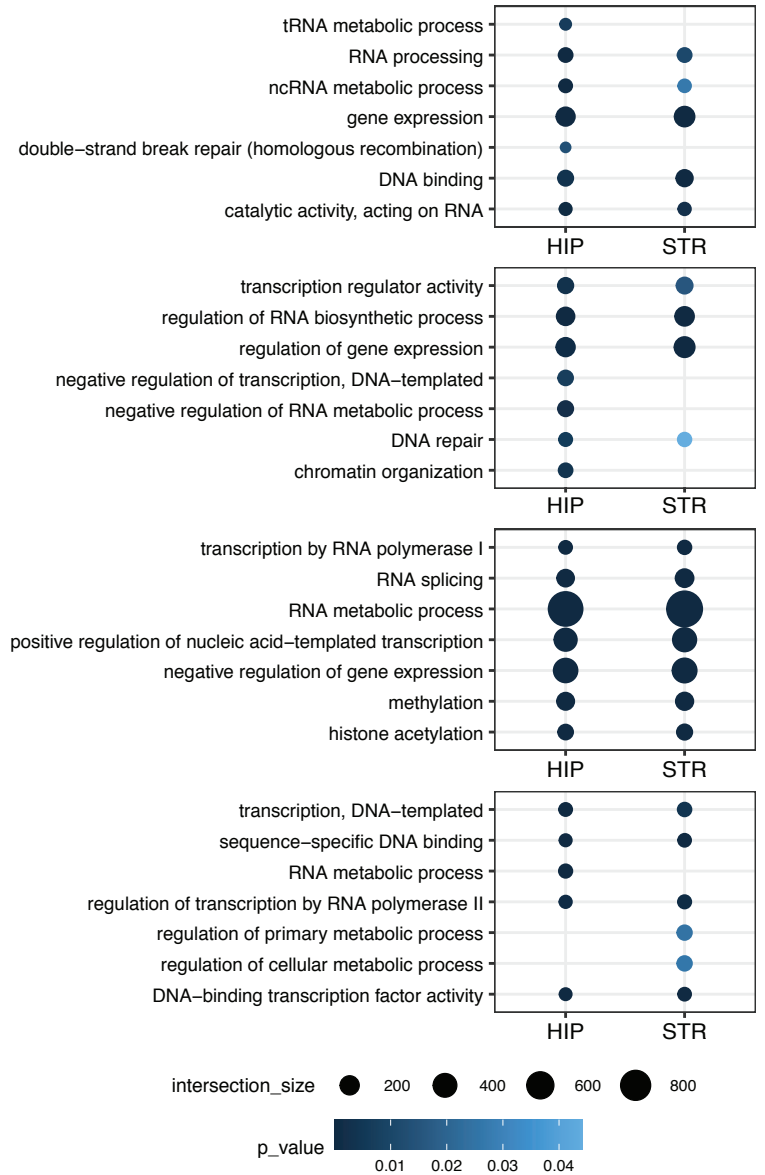

**Supplemental Fig. 7. Clusters representing downregulated genes in the hippocampus and the striatum.** Both the hippocampus (**A**) and striatum (**B**) included similar numbers of genes that were downregulated after combining HDACi with CFC ("HDACi CFC reduced", top) and genes that were reduced by HDACi-Context treatment but rescued by HDACi-CFC ("HDACi CFC rescued", second from top). Both brain regions also included genes that were stably reduced by HDACi treatment, regardless of the behavioral paradigm ("HDACi stably reduced", third from top) and genes that were reduced by HDACi-Context and further reduced by HDACi-CFC ("HDACi further reduced", bottom). (**C**) Examples of gene ontologies (GOs) from the hippocampus (left) and striatum (right) for the trajectory in the corresponding row. Line plots represent mean  $\pm$ SEM.

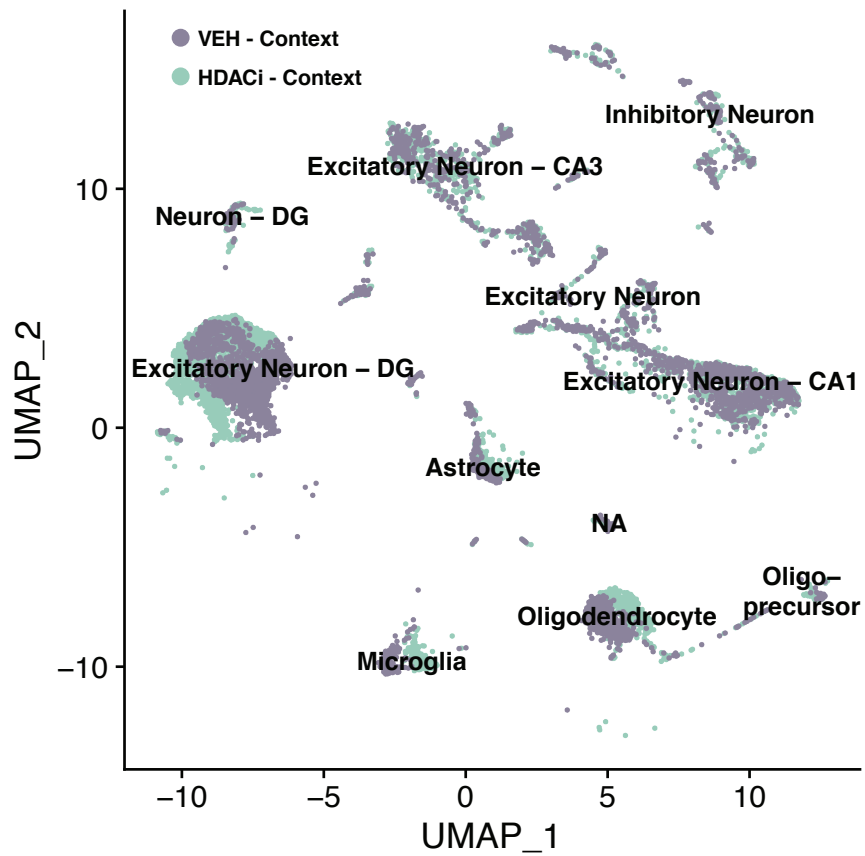

**Supplemental Fig. 8. UMAP projection of samples taken after context only exposure (Context).** Note that although the same cell types are represented in the CFC (Fig. 3D) and Context comparisons, there is no HDACi-mediated split in the Excitatory Neurons of the DG. Only glial clusters split after HDACi treatment paired with context exposure.



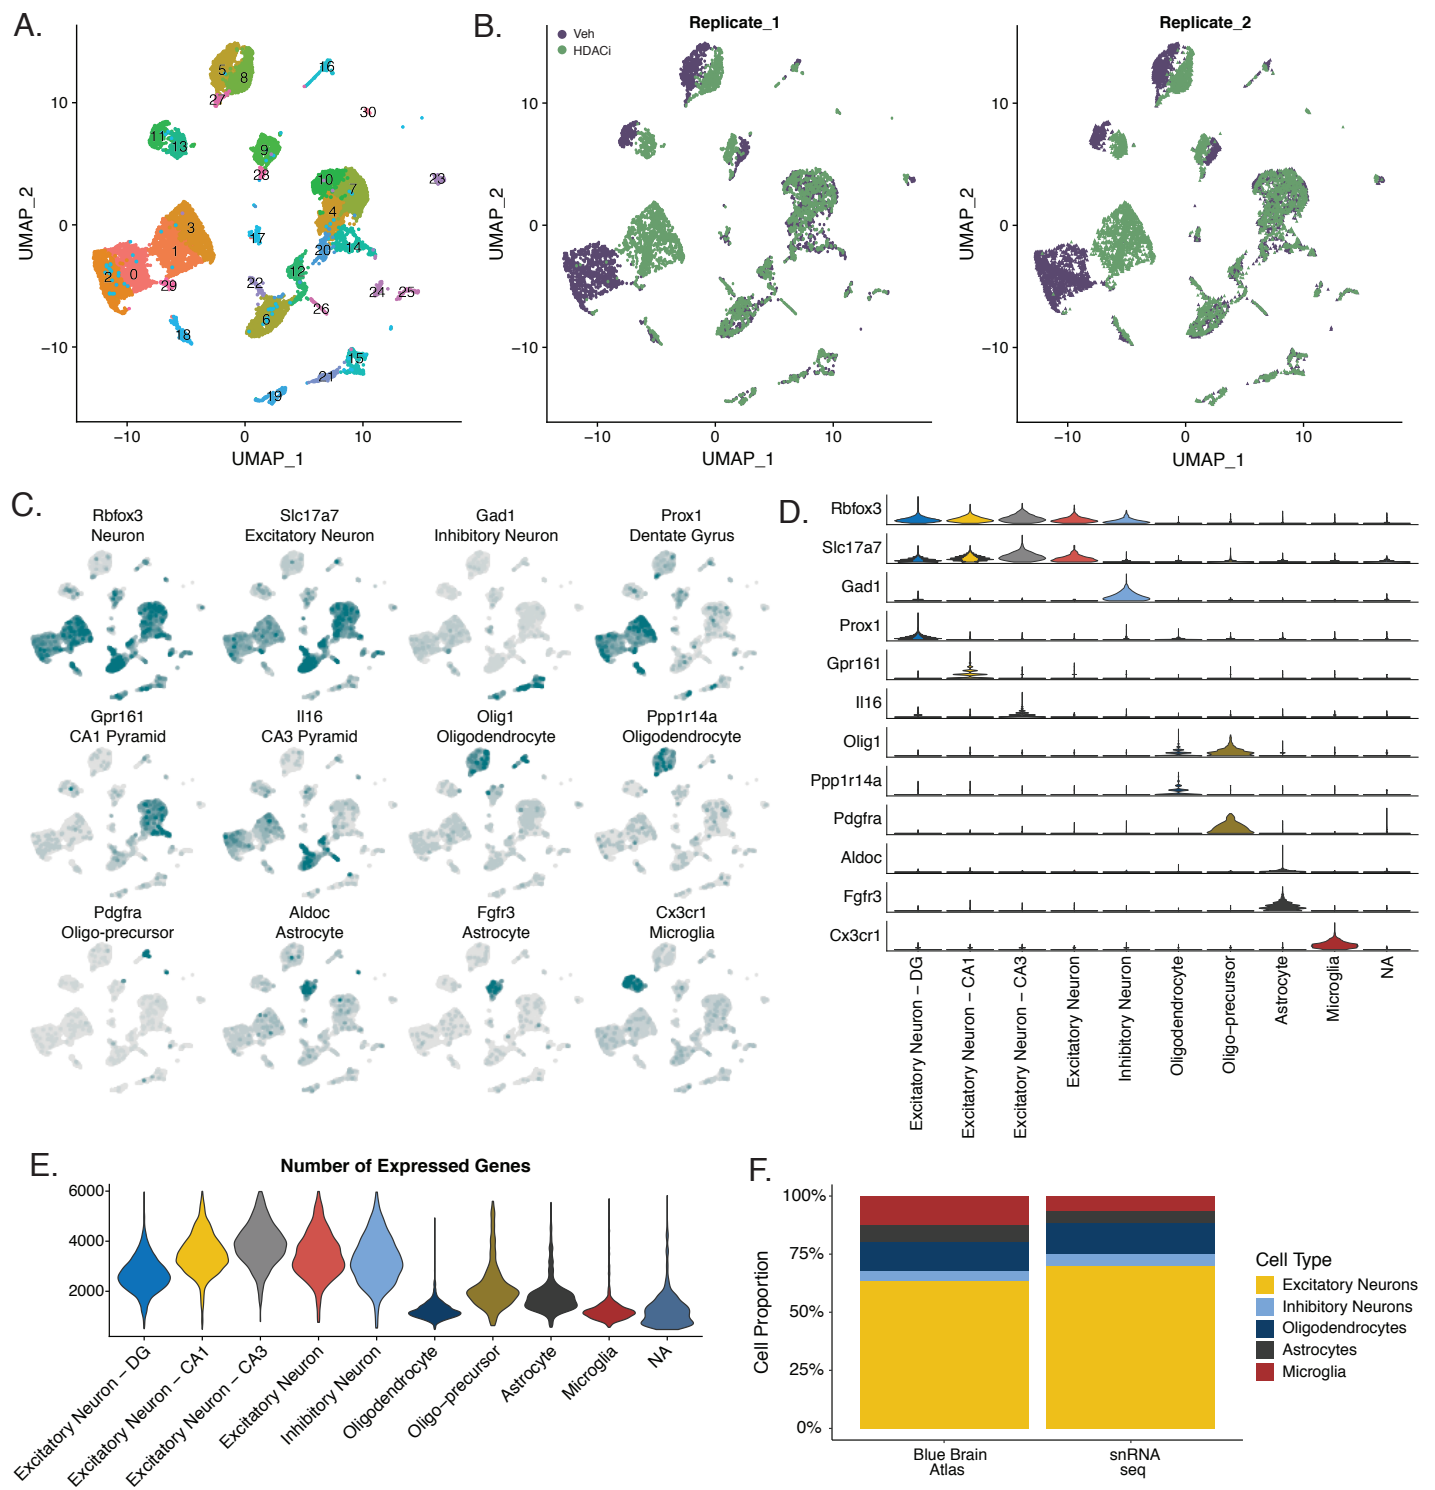

**Supplemental Fig. 9. snRNA-Seq cell type assignments.** (A) snRNA-seq gene count matrices were merged, filtered and normalized using SCTransform and underwent UMAP clustering. (B) UMAP projection of drug treatment replicates. (C) Clusters were assigned to cell types by overlaying UMI expression for known cell type markers over each cluster. (D) Clusters were assigned to cell types and hippocampal regions based on cell type markers with the highest UMI expression in each cluster. (E) Nuclei assigned to neuronal cell types had more expressed genes than glial cell types (oligodendrocytes, oligo-precursors, astrocytes and microglia). (F) Cell type assignments (right column) were similar to known cell proportions in the hippocampus, taken from the Blue Brain Atlas (left column), irrespective of drug and behavioral treatment. n = 2 biological replicates/group (HDACi-CFC and VEH-CFC).

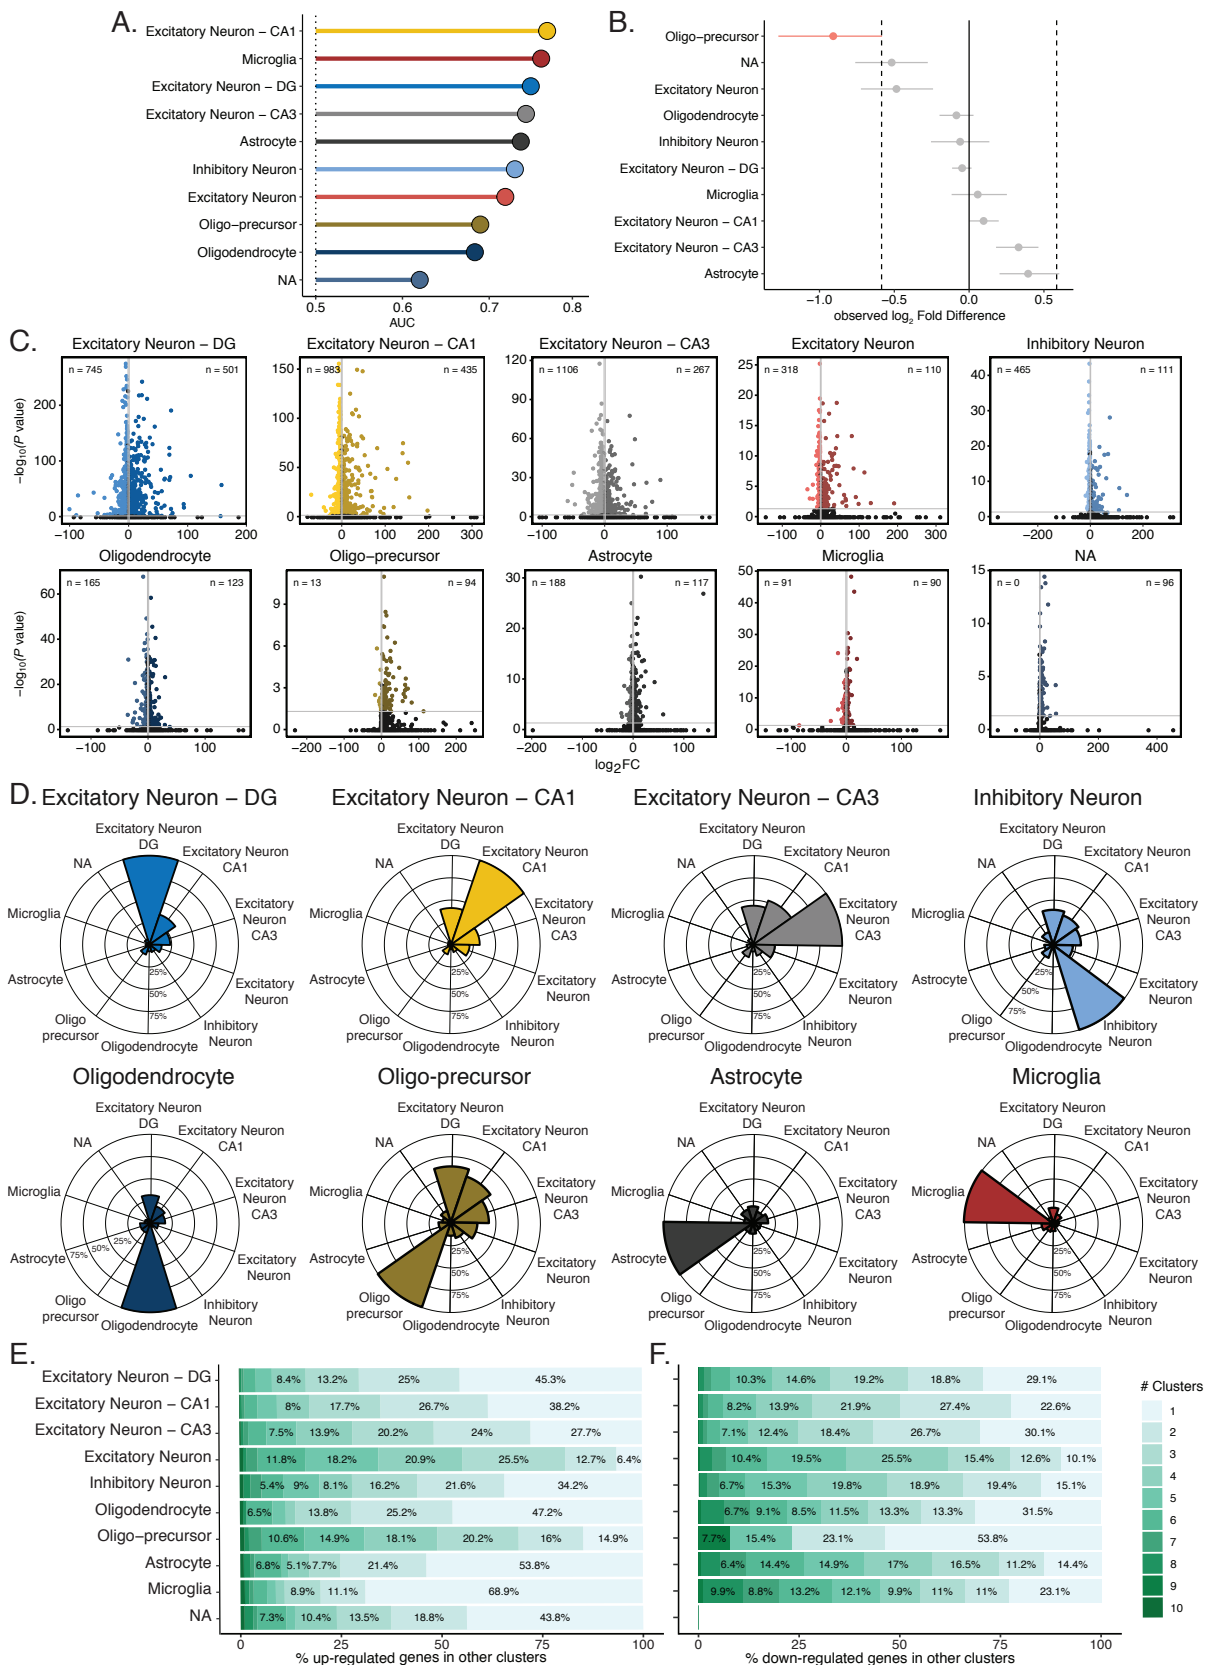

**Supplemental Fig. 10. HDACi perturbs distinct gene sets in different cell types.** (A) Augur analysis. Area under the receiver operating characteristic curve (AUC) is above random chance (0.5) for all cell types. (B) Cell type composition permutation test (#permutations = 1000). (C) Volcano plots showing magnitude of differential expression ( $\log_2FC \geq 1$ ; adjusted p-value  $\leq 0.05$ ) versus statistical significance ( $-\log_{10}$  P-value) for HDACi-CFC compared to VEH-CFC in each cell type. (D) Overlap of upregulated genes across cell types. (E and F) Percent of genes found in other clusters for each cell type. Genes that were found in only one cluster are unique to that cell type for upregulated (E) and downregulated (F) genes in each cluster.

## A. Removing up-regulated genes and reclustering

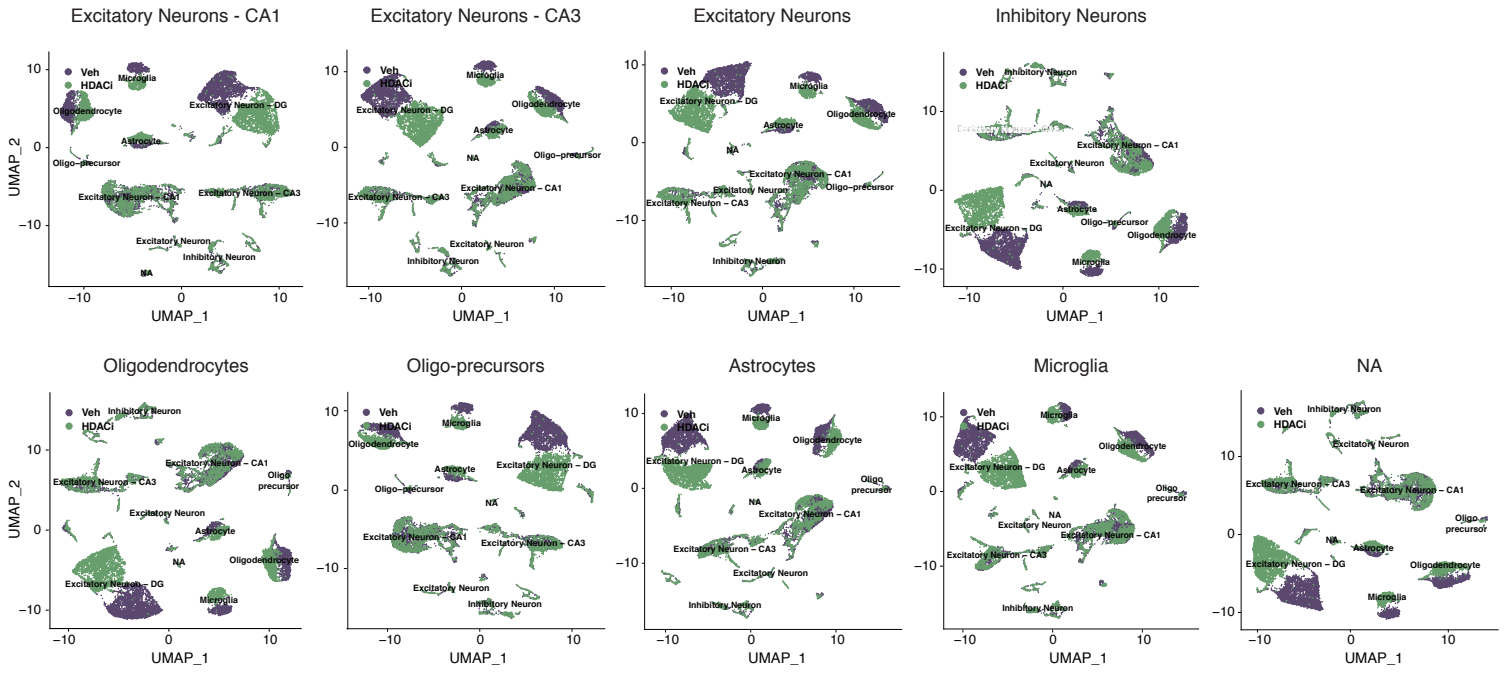

## B. Removing down-regulated genes and reclustering

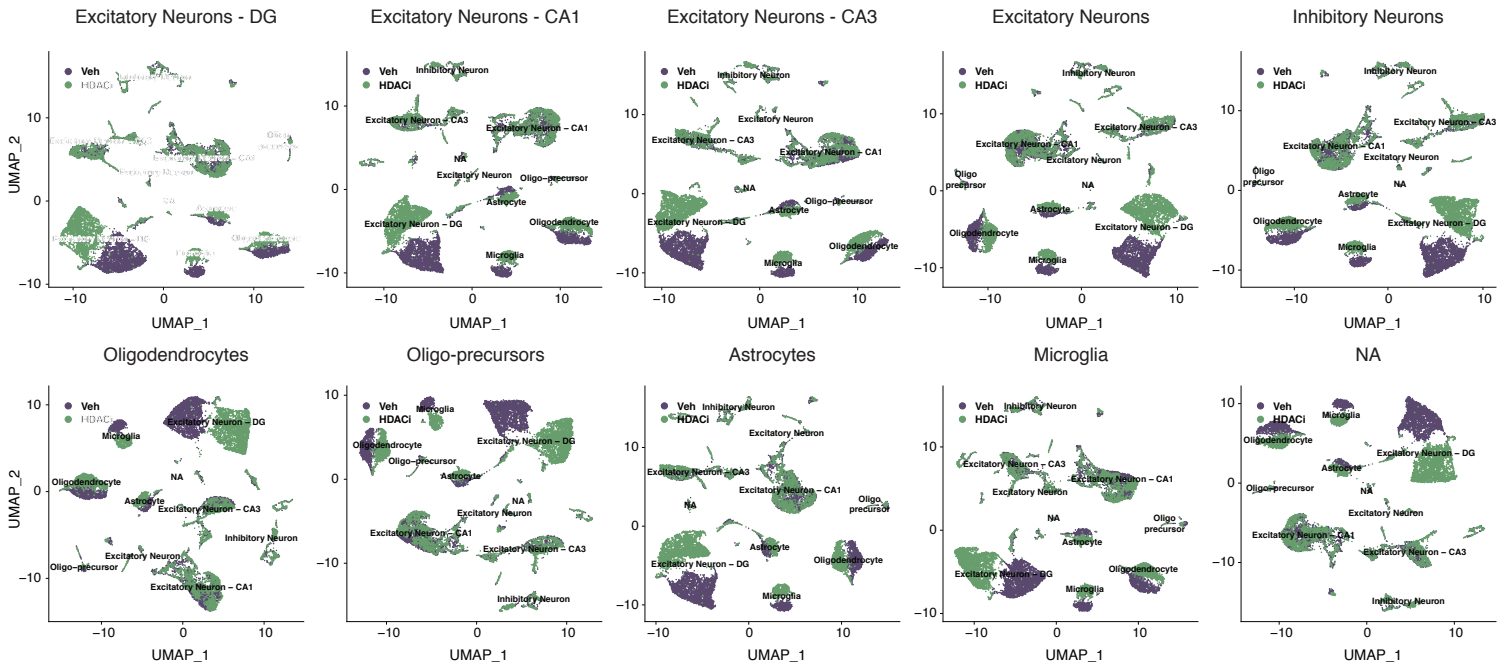

**Supplemental Fig. 11. Removing up- and downregulated genes and re-running UMAP to determine unique gene sets.** Removing up (A) and downregulated (B) genes and re-running UMAP clustering revealed whether the HDACi-induced differential expression calculated for each cell type was unique for that cell type. For example, removing upregulated genes from astrocytes remerged the astrocyte cluster in the UMAP, whereas removing downregulated genes did not.

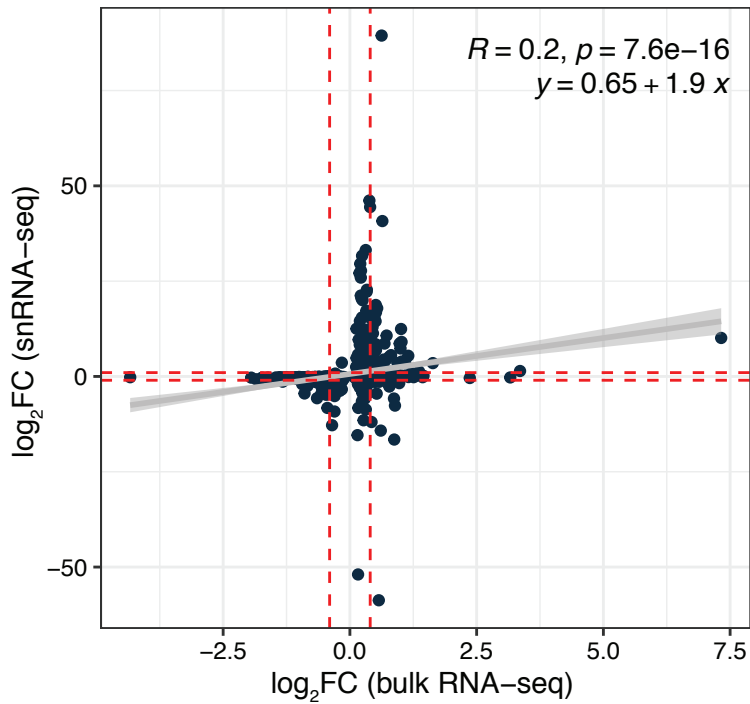

**Supplemental Fig. 12. Log<sub>2</sub>FC comparison of genes that are significant (p-value ≤ 0.05) in both bulk and snRNAseq analyses.** Of the 7601 genes that were expressed in both the bulk and snRNA-seq (Excitatory Neurons of the DG), 1517 had a significant log<sub>2</sub>FC in the HDACi-CFC vs. VEH-CFC comparisons. Most of these genes were differentially expressed in the same direction as 251 genes were upregulated (log<sub>2</sub>FC > 0) and 1126 were downregulated (log<sub>2</sub>FC < 0) in both experiments, which is illustrated by the significant correlation between the two types of analyses. In addition, there are 135 genes that were upregulated in the bulk comparison, but downregulated in the snRNA comparison, and there are 5 genes that were upregulated in the snRNA comparison, but downregulated in the bulk comparison.

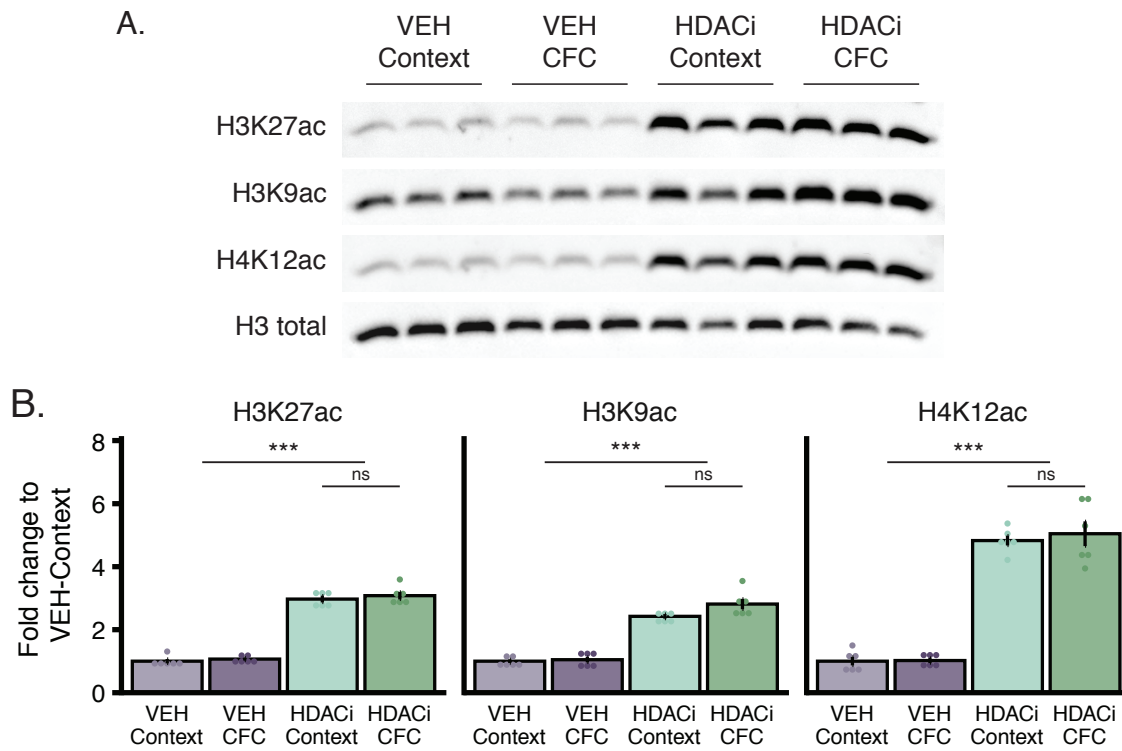

**Supplemental Fig. 13. HDACi enriches H3K27, H3K9 and H4K12 acetylation regardless of behavioral condition. (A)** Representative Western blot for hippocampal H3K27ac, H3K9ac and H4K27ac for all four treatments compared to total H3 abundance. **(B)** Western blot quantification for H3K27ac, H3K9ac and H4K12ac plotted as fold change to the average VEH-Context luminescence. Graphs represent mean  $\pm$ SEM.  $n = 6$  biological replicates per group, each with 2 technical replicates. Two-way ANOVA, \*\*\*  $P < 0.001$ , ns = not significant.

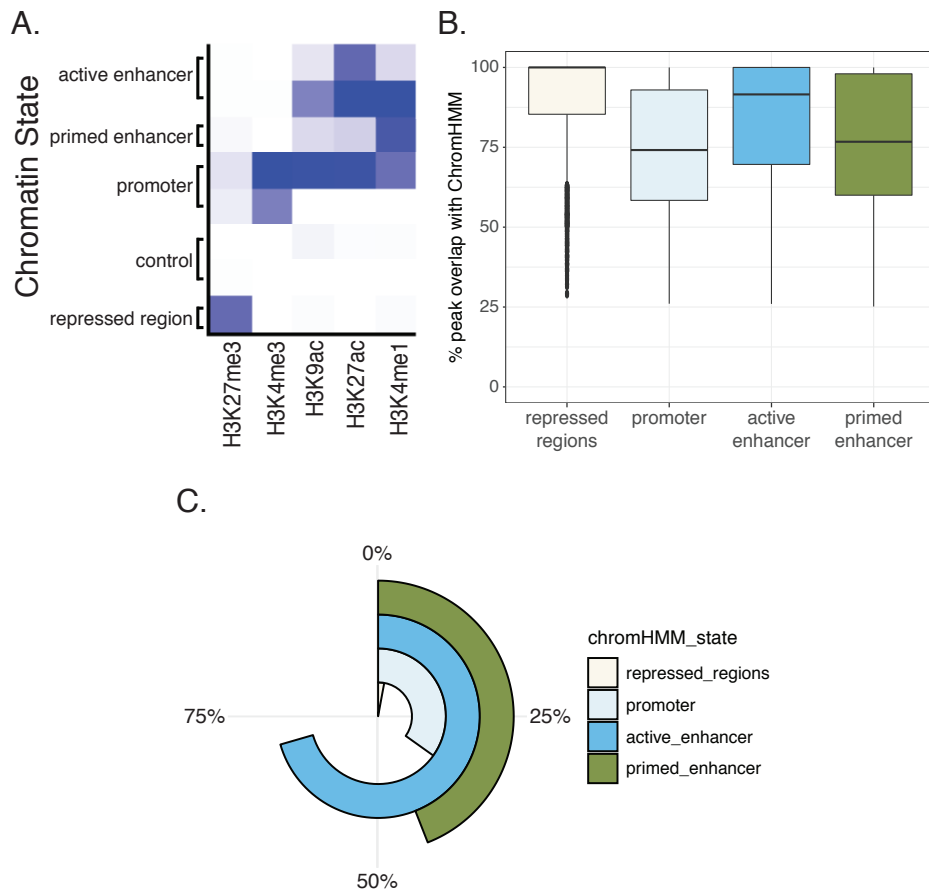

**Supplemental Fig. 14. H3K27ac peaks at enhancer and promoter regions.** **(A)** Five distinct chromatin states were assigned to the full mm10 genome using previously published histone PTMs and ChromHMM. H3K27me3 acts as a repressive marker, H3K4me3 and H3K9ac are promoter markers, H3K27ac is a marker of active enhancers and H3K4me1 is enriched at primed enhancers. **(B)** Percent of peak overlap with assigned chromatin states shows that most peaks overlap with their assigned state by more than 50%. Graphs shown as box and whisker plots with outliers plotted as points. **(C)** Proportion of each chromatin state enriched by H3K27ac peaks in all four treatments indicates that H3K27ac peaks are enriched at active and primed enhancers and not repressed regions.

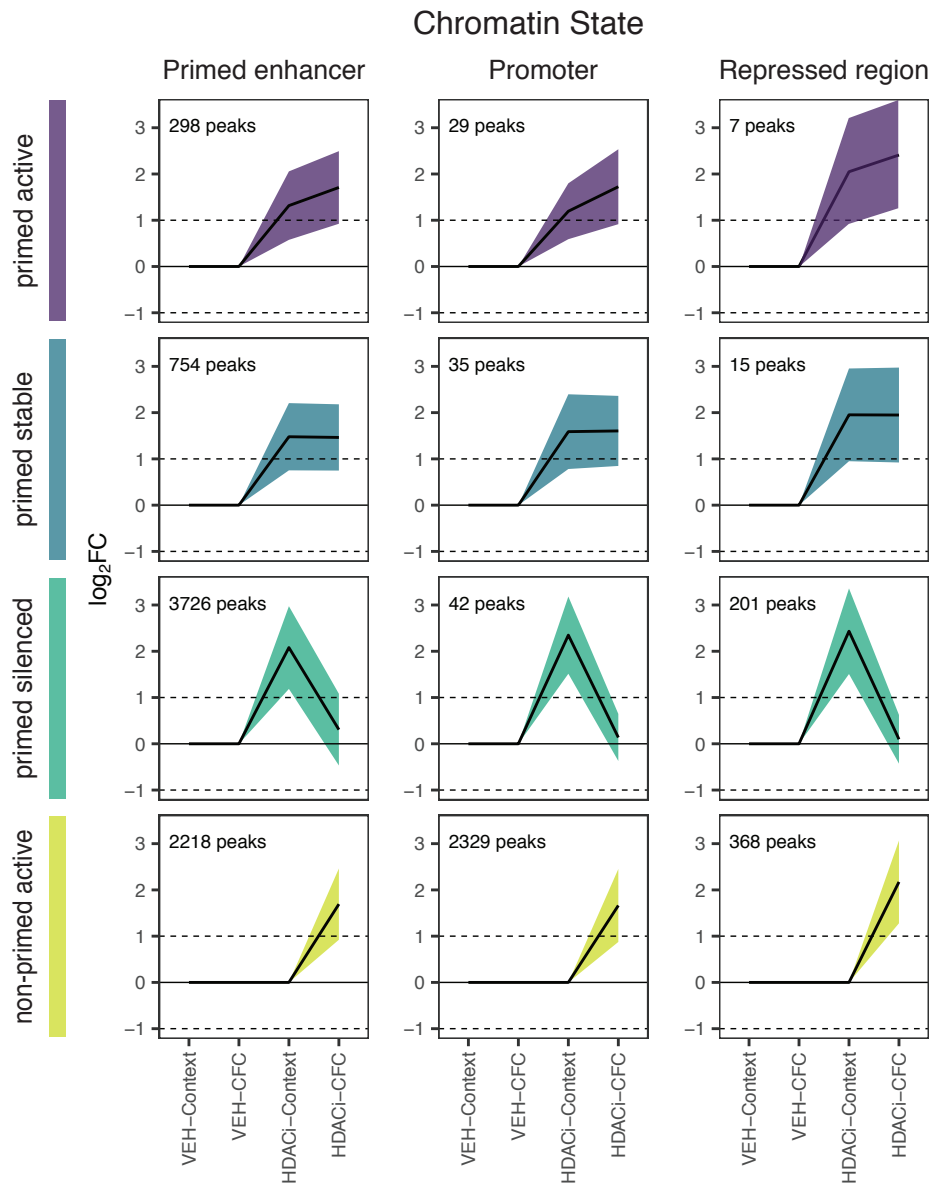

**Supplemental Fig. 15. Trajectory analysis for H3K27ac peaks not associated with active enhancers.** Line graphs in trajectory plots represent significant log<sub>2</sub>FC values for each group in clusters of interest for primed enhancers (left), promoters (middle) and repressed regions (right). Count in upper left corner indicates the number of genes in each cluster. Line plots shown as mean ±SEM.

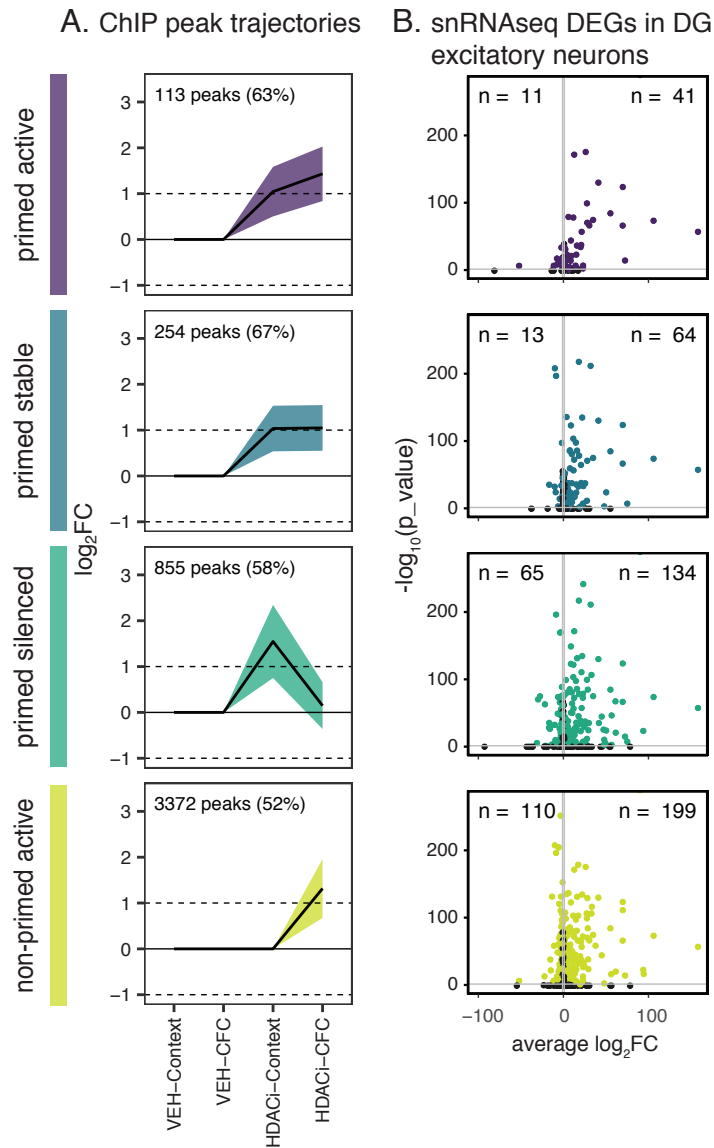

**Supplemental Fig. 16. Genes associated with active enhancers in the ChIP-seq trajectory analysis that are differentially expressed in excitatory neurons of the DG. (A)** Trajectory plots representing changes in H3K27ac in active enhancers that are also expressed in the excitatory neurons of the DG in the snRNA-seq. Values in upper left corners indicate numbers of overlapping genes and percent of genes from each trajectory in Fig 4D. Line plots shown as mean  $\pm$ SEM. **(B)** Volcano plots for genes that are expressed in the excitatory neurons of the DG and are present in the respective trajectory of interest in the ChIP-seq analysis. Most genes that have increased H3K27ac at active enhancers are also up regulated in the excitatory neurons of the DG. n-values in corners represent the genes that are up regulated ( $\log_2FC \geq 1$ ; adjusted  $P$ -value  $\leq 0.05$ ).
